# Supplementary material
Source: Research Square preprint supplement (doi:10.21203/rs.3.rs-8861753/v1)
Supplement: Supplementary file 1 [file d070ab246fdfed2691c6748c.docx]

**Supplementary information**

**BMC Psychology**

**Exploratory Analysis of Gender-Specific Symptom Burden in Child Psychiatric Care**

Moritz Russo1, Dina Weindl-Wagner1,2, Alexander Haselgruber2, Karin Zajec2,3, Judith Noske2 & Brigitte Lueger-Schuster1*

1Unit of Psychotraumatology, Faculty of Psychology, University of Vienna, Vienna, Austria.

2Department of child and adolescent psychiatry Hinterbrühl, Federal Clinic Baden-Mödling, Hinterbrühl, Austria.

3Institute for psychosocial medicine, psychotherapy and childhood research, Karl-Landsteiner-Society, St. Pölten, Austria.

*Corresponding author: [brigitte.lueger-schuster@univie.ac.at](mailto:brigitte.lueger-schuster@univie.ac.at)

| **Table S1**  *Post-hoc Contrasts of Group Differences in Self-Reported Internalizing Symptoms* | | | |
| --- | --- | --- | --- |
| Contrast | *b* | SE | *t* (df) |
| Young Boys compared to |  |  |  |
| Young Girls | −2.55 | 1.28 | −1.99 (399) |
| Young Adolescent Boys | −0.92 | 0.65 | −1.41 (399) |
| Young Adolescent Girls | −2.62*** | 0.62 | −4.21 (399) |
| Adolescent Boys | −1.98* | 0.68 | −2.94 (399) |
| Adolescent Girls | −3.31*** | 0.63 | −5.26 (399) |
| Young Girls compared to |  |  |  |
| Young Adolescent Boys | 1.63 | 1.18 | 1.39 (399) |
| Young Adolescent Females | −0.07 | 1.16 | −0.06 (399) |
| Adolescent Boys | 0.56 | 1.19 | 0.48 (399) |
| Adolescent Girls | −0.76 | 1.16 | −0.66 (399) |
| Young Adolescent Boys compared to |  |  |  |
| Young Adolescent Girls | −1.70*** | 0.37 | −4.63 (399) |
| Adolescent Boys | −1.06 | 0.45 | −2.36 (399) |
| Adolescent Girls | −2.39*** | 0.38 | −6.31 (399) |
| Young Adolescent Girls compared to |  |  |  |
| Adolescent Boys | 0.64 | 0.40 | 1.58 (399) |
| Adolescent Girls | −0.69 | 0.32 | −2.14 (399) |
| Adolescent Boys compared to |  |  |  |
| Adolescent Girls | −1.33* | 0.41 | −3.21 (399) |
| *Note.* SE = standard error;df = degrees of freedom; * p <.05. ** p <.01. *** p <.001. | | | |

| **Table S2**  *Post-hoc Contrasts of Group Differences in Caregiver-Reported Internalizing Symptoms* | | | |
| --- | --- | --- | --- |
| Contrast | *b* | SE | *t* (df) |
| Young Boys compared to |  |  |  |
| Young Girls | 0.36 | 1.15 | 0.31 (162) |
| Young Adolescent Boys | −2.13* | 0.65 | −3.28 (162) |
| Young Adolescent Girls | −2.96*** | 0.61 | −4.85 (162) |
| Adolescent Boys | −2.14 | 0.75 | −2.86 (162) |
| Adolescent Girls | −2.64** | 0.67 | −3.96 (162) |
| Young Girls compared to |  |  |  |
| Young Adolescent Boys | −2.49 | 1.13 | −2.20 (162) |
| Young Adolescent Females | −3.31* | 1.11 | −2.99 (162) |
| Adolescent Boys | −2.50 | 1.19 | −2.10 (162) |
| Adolescent Girls | −3.00 | 1.14 | −2.63 (162) |
| Young Adolescent Boys compared to |  |  |  |
| Young Adolescent Girls | −0.83 | 0.57 | −1.45 (162) |
| Adolescent Boys | −0.01 | 0.72 | −0.02 (162) |
| Adolescent Girls | −0.51 | 0.63 | −0.81 (162) |
| Young Adolescent Girls compared to |  |  |  |
| Adolescent Boys | 0.81 | 0.68 | 1.19 (162) |
| Adolescent Girls | 0.31 | 0.59 | 0.53 (162) |
| Adolescent Boys compared to |  |  |  |
| Adolescent Girls | −0.50 | 0.74 | −0.68 (162) |
| *Note.* SE = standard error;df = degrees of freedom; * p <.05. ** p <.01. *** p <.001. | | | |

| **Table S3**  *Post-hoc Contrasts of Group Differences in Self-Reported Externalizing Symptoms* | | | |
| --- | --- | --- | --- |
| Contrast | *b* | SE | *t* (df) |
| Young Boys compared to |  |  |  |
| Young Girls | 1.15 | 1.29 | 0.89 (399) |
| Young Adolescent Boys | 1.26 | 0.66 | 1.90 (399) |
| Young Adolescent Girls | 2.13* | 0.63 | 3.38 (399) |
| Adolescent Boys | 1.54 | 0.68 | 2.25 (399) |
| Adolescent Girls | 2.78*** | 0.64 | 4.37 (399) |
| Young Girls compared to |  |  |  |
| Young Adolescent Boys | 0.11 | 1.19 | 0.09 (399) |
| Young Adolescent Females | 0.99 | 1.17 | 0.84 (399) |
| Adolescent Boys | 0.39 | 1.20 | 0.32 (399) |
| Adolescent Girls | 1.64 | 1.18 | 1.39 (399) |
| Young Adolescent Boys compared to |  |  |  |
| Young Adolescent Girls | 0.87 | 0.37 | 2.35 (399) |
| Adolescent Boys | 0.28 | 0.46 | 0.61 (399) |
| Adolescent Girls | 1.53** | 0.38 | 3.99 (399) |
| Young Adolescent Girls compared to |  |  |  |
| Adolescent Boys | −0.60 | 0.41 | −1.46 (399) |
| Adolescent Girls | 0.65 | 0.33 | 2.00 (399) |
| Adolescent Boys compared to |  |  |  |
| Adolescent Girls | 1.25* | 0.42 | 2.98 (399) |
| *Note.* SE = standard error;df = degrees of freedom; * p <.05. ** p <.01. *** p <.001. | | | |

| **Table S4**  *Post-hoc Contrasts of Group Differences in Caregiver-Reported Externalizing Symptoms* | | | |
| --- | --- | --- | --- |
| Contrast | *b* | SE | *t* (df) |
| Young Boys compared to |  |  |  |
| Young Girls | 0.45 | 1.39 | 0.33 (162) |
| Young Adolescent Boys | 0.10 | 0.78 | 0.13 (162) |
| Young Adolescent Girls | 2.37* | 0.73 | 3.23 (162) |
| Adolescent Boys | 1.89 | 0.90 | 2.09 (162) |
| Adolescent Girls | 3.11** | 0.80 | 3.87 (162) |
| Young Girls compared to |  |  |  |
| Young Adolescent Boys | −0.35 | 1.36 | −0.26 (162) |
| Young Adolescent Females | 1.92 | 1.33 | 1.44 (162) |
| Adolescent Boys | 1.43 | 1.43 | 1.00 (162) |
| Adolescent Girls | 2.66 | 1.37 | 1.93 (162) |
| Young Adolescent Boys compared to |  |  |  |
| Young Adolescent Girls | 2.27* | 0.69 | 3.31 (162) |
| Adolescent Boys | 1.79 | 0.86 | 2.07 (162) |
| Adolescent Girls | 3.01** | 0.76 | 3.96 (162) |
| Young Adolescent Girls compared to |  |  |  |
| Adolescent Boys | −0.48 | 0.82 | −0.59 (162) |
| Adolescent Girls | 0.74 | 0.71 | 1.04 (162) |
| Adolescent Boys compared to |  |  |  |
| Adolescent Girls | 1.22 | 0.88 | 1.38 (162) |
| *Note.* SE = standard error;df = degrees of freedom; * p <.05. ** p <.01. *** p <.001. | | | |

| **Table S5**  *Model Fit Statistics for LCA Models with two to six Classes* | | | |
| --- | --- | --- | --- |
| *N* Classes | LL | AIC | BIC |
| 2 | -1466.61 | 2967.23 | 3035.71 |
| 3 | -1425.13 | 2904.26 | 3013.02 |
| 4 | -1388.51 | 2851.01 | 3000.06 |
| 5 | -1466.61 | 3027.23 | 3216.56 |
| 6 | -1567.10 | 3248.20 | 3477.81 |
| *Note.* LL =Log Likelihood, less negative values indicate better model fit; AIC = Akaike Information Criterion, lower values indicate better model fit; BIC = Bayesian Information Criterion, lower values indicate better model fit. | | | |
